# Supplementary material for: The Efficacy and Safety of Knotless Barbed Sutures in the Surgical Field: A Systematic Review and Meta-analysis of Randomized Controlled Trials
Source: PubMed Central journal article supplement (PMC4804241; doi:10.1038/srep23425), 2016-03-23
Supplement: srep23425-s1.pdf [file srep23425-s1.pdf]

**Title: The Efficacy and Safety of Knotless Barbed Sutures in the Surgical Field:  
A Systematic Review and Meta-analysis of Randomized Controlled Trials**

**Authors**

Yifei Lin<sup>1</sup>, Sike Lai<sup>2</sup>, Liang Du<sup>3\*</sup>, Jin Huang<sup>3\*</sup>

1. Institute of Urology, Department of Urology, West China Hospital, Sichuan University, Guoxuexiang 37, Chengdu, Sichuan, 610041, China

2. West China School of Medicine, Sichuan University, Guoxuexiang 37, Chengdu, Sichuan, 610041, China.

3. West China Hospital, Sichuan University, Guoxuexiang 37, Chengdu, Sichuan, 610041, China.

\* Correspondence author

Correspondence should be addressed to

1. Dr. Jin HUANG at West China Hospital, Sichuan University, Guoxuexiang 37 Chengdu, Sichuan 610041, China with E-mail address: michael\_huangjin@163.com

2. Dr. Liang DU at West China Hospital, Sichuan University, Guoxuexiang 37, Chengdu, Sichuan, China with E-mail address: 125798620@qq.com

Supplementary Figure Legends:

Appendix Figure 1: A forest plot of suturing time of different surgeries with or without barbed suture

Appendix Figure 2: A forest plot of suturing time of different barbed types with or without barbed suture

Appendix Figure 3: A forest plot of operative time of different surgeries with or without barbed suture

Appendix Figure 4: A forest plot of operative time of different barbed types with or without barbed suture

Appendix Figure 5: A forest plot of estimated blood loss of different surgeries with or without barbed suture

Appendix Figure 6: A forest plot of estimated blood loss of different barbed types with or without barbed suture

Appendix Figure 7: A forest plot of postoperative complications of different surgeries with or without barbed suture

Appendix Figure 8: A forest plot of postoperative complications of different barbed types with or without barbed suture

Appendix Figure 9: Sensitivity analyses of postoperative complications of different barbed types with or without barbed suture

Appendix Figure 10: Funnel plot of suturing time in all included studies

Appendix Figure 11: Funnel plot of operative time in all included studies

Appendix Figure 12: Funnel plot of estimate blood loss in all included studies

Appendix Figure 13: Funnel plot of postoperative complications in all included studies

Appendix Table 1: Quality assessment of studies in the meta-analysis based on Cochrane recommendations

Appendix Figure 1: A forest plot of suturing time of different surgeries with or without barbed suture

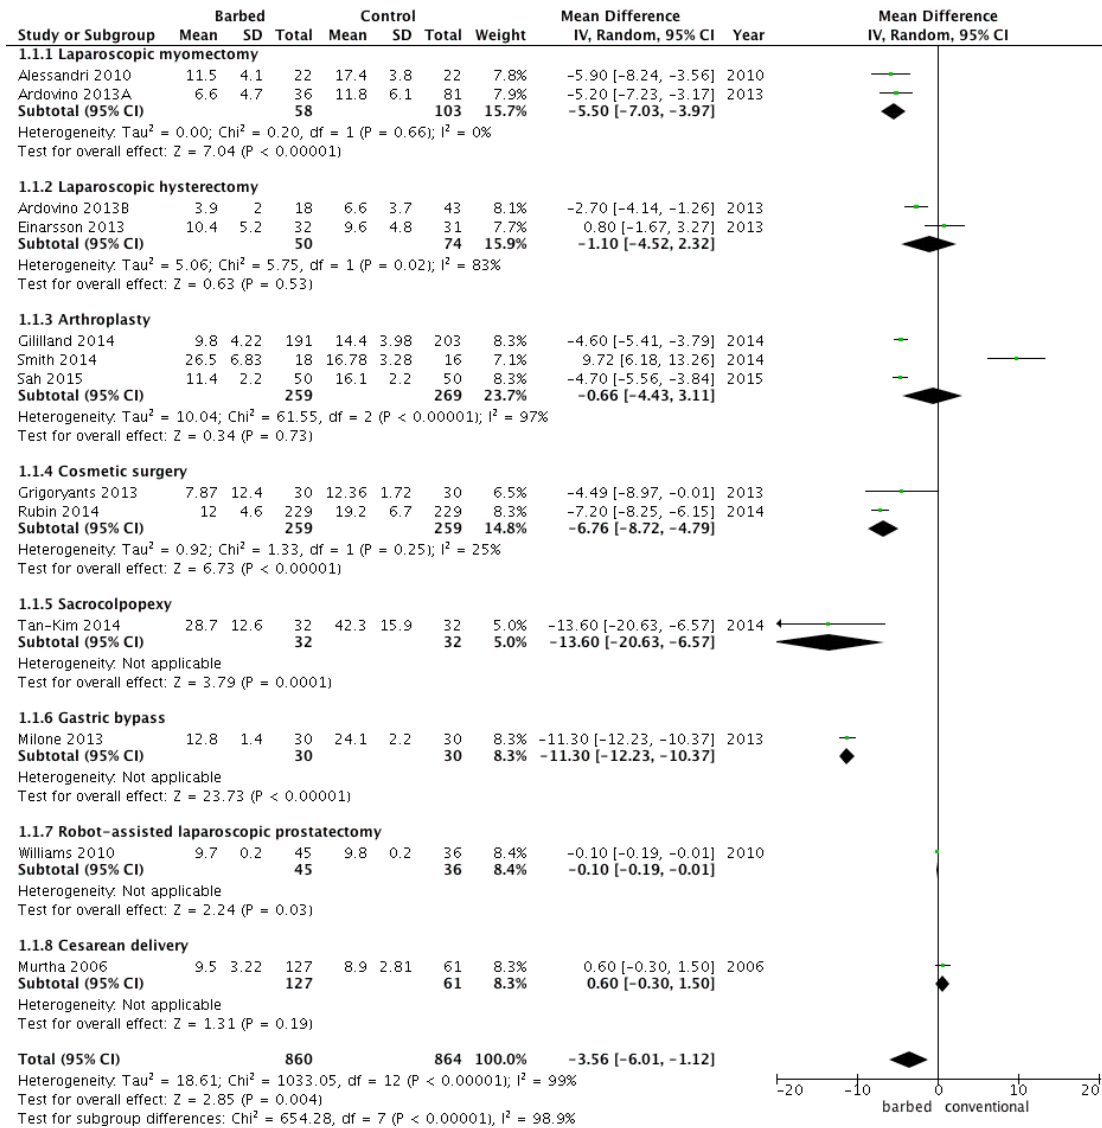

Appendix Figure 2: A forest plot of suturing time of different barbed types with or without barbed suture

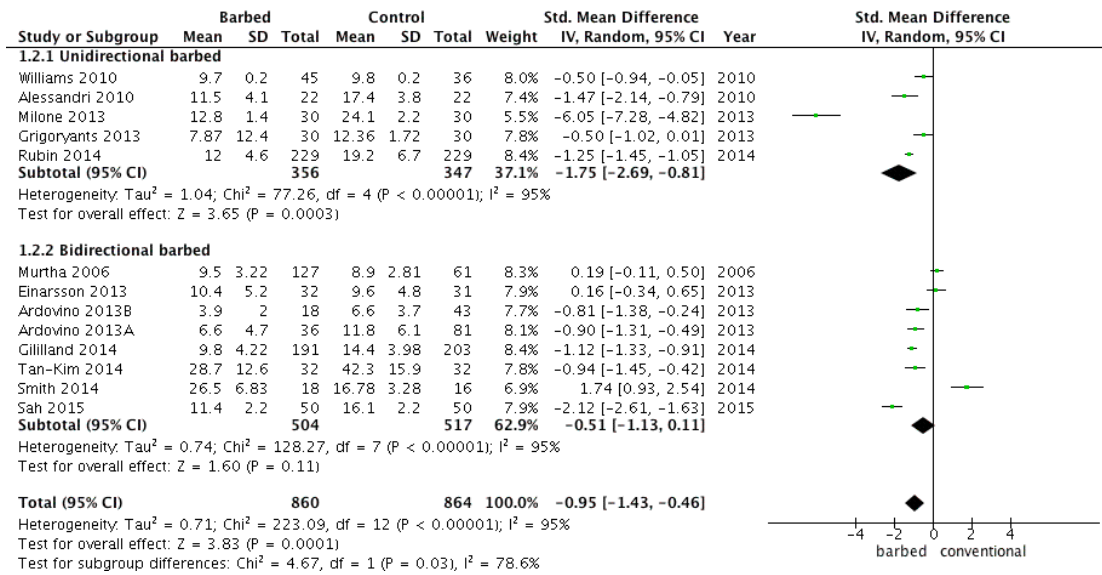

Appendix Figure 3: A forest plot of operative time of different surgeries with or without barbed suture

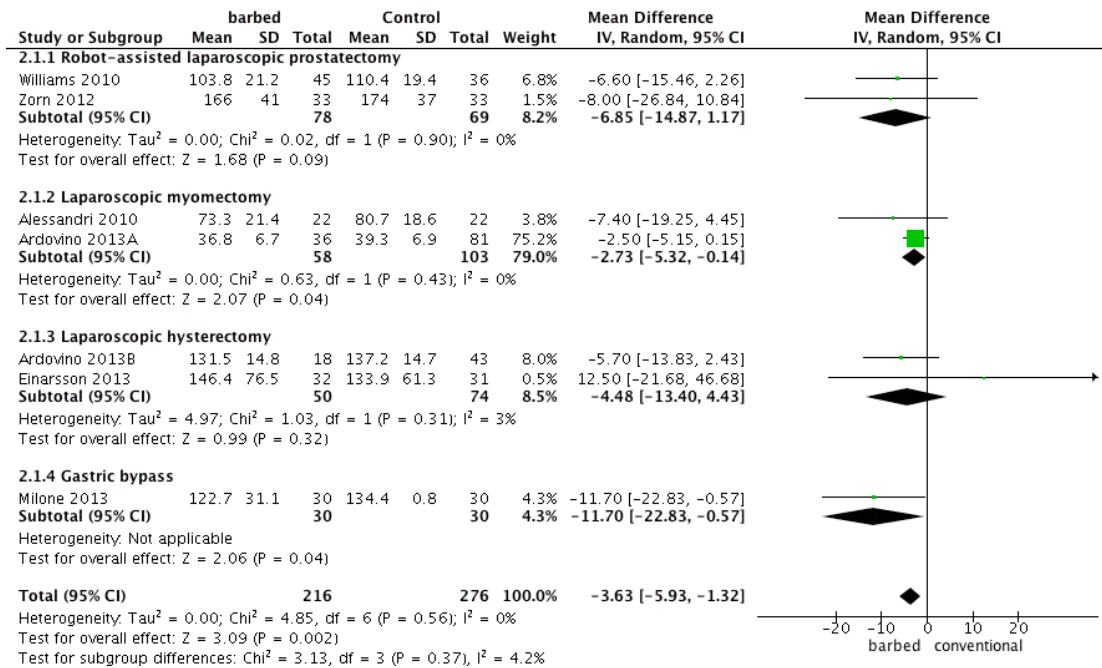

Appendix Figure 4: A forest plot of operative time of different barbed types with or without barbed suture

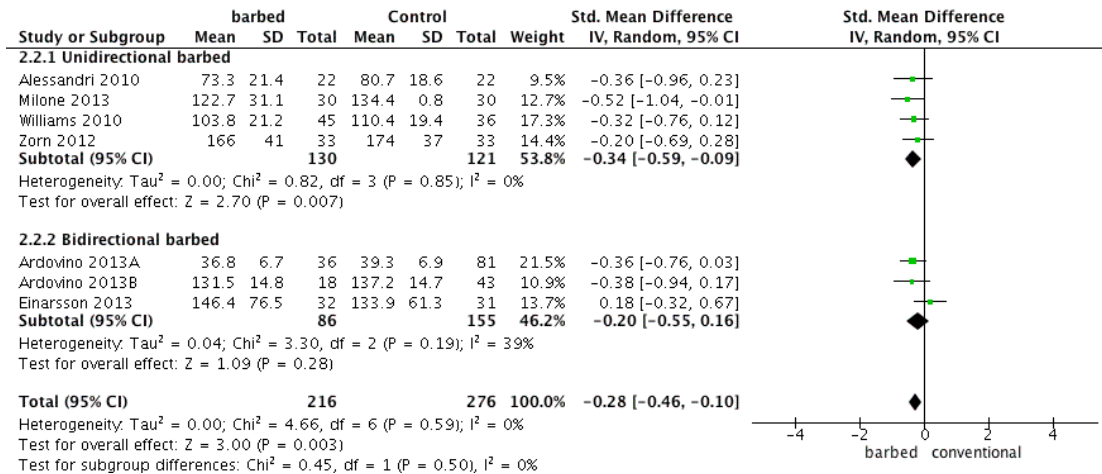

Appendix Figure 5: A forest plot of estimated blood loss of different IV surgeries with or without barbed suture

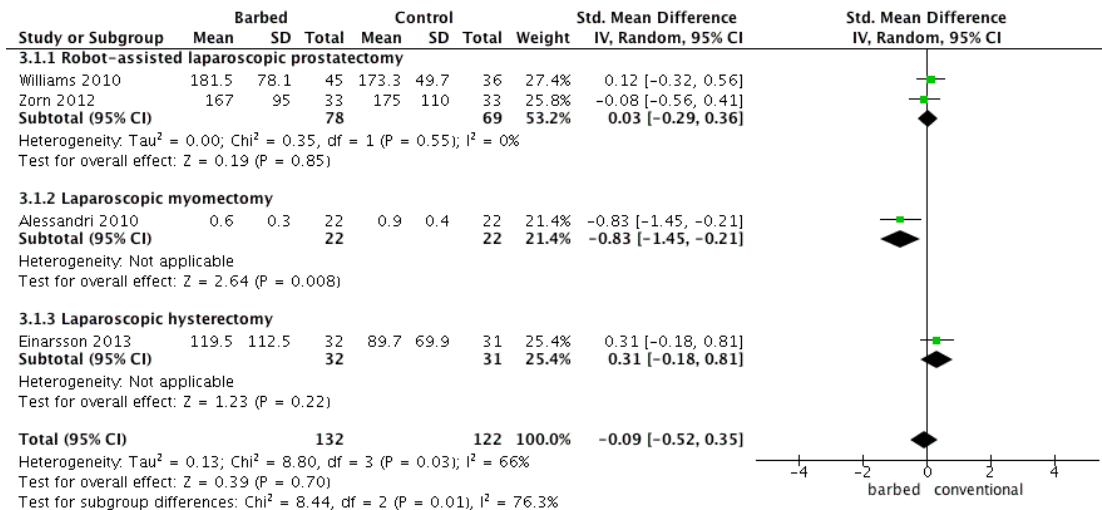

Appendix Figure 6: A forest plot of estimated blood loss of different barbed types with or without barbed suture

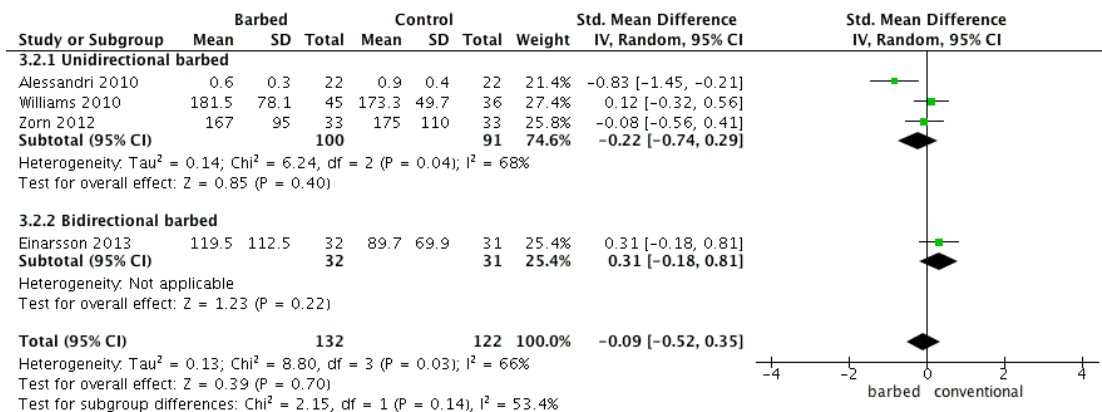

Appendix Figure 7: A forest plot of postoperative complications of different surgeries with or without barbed suture

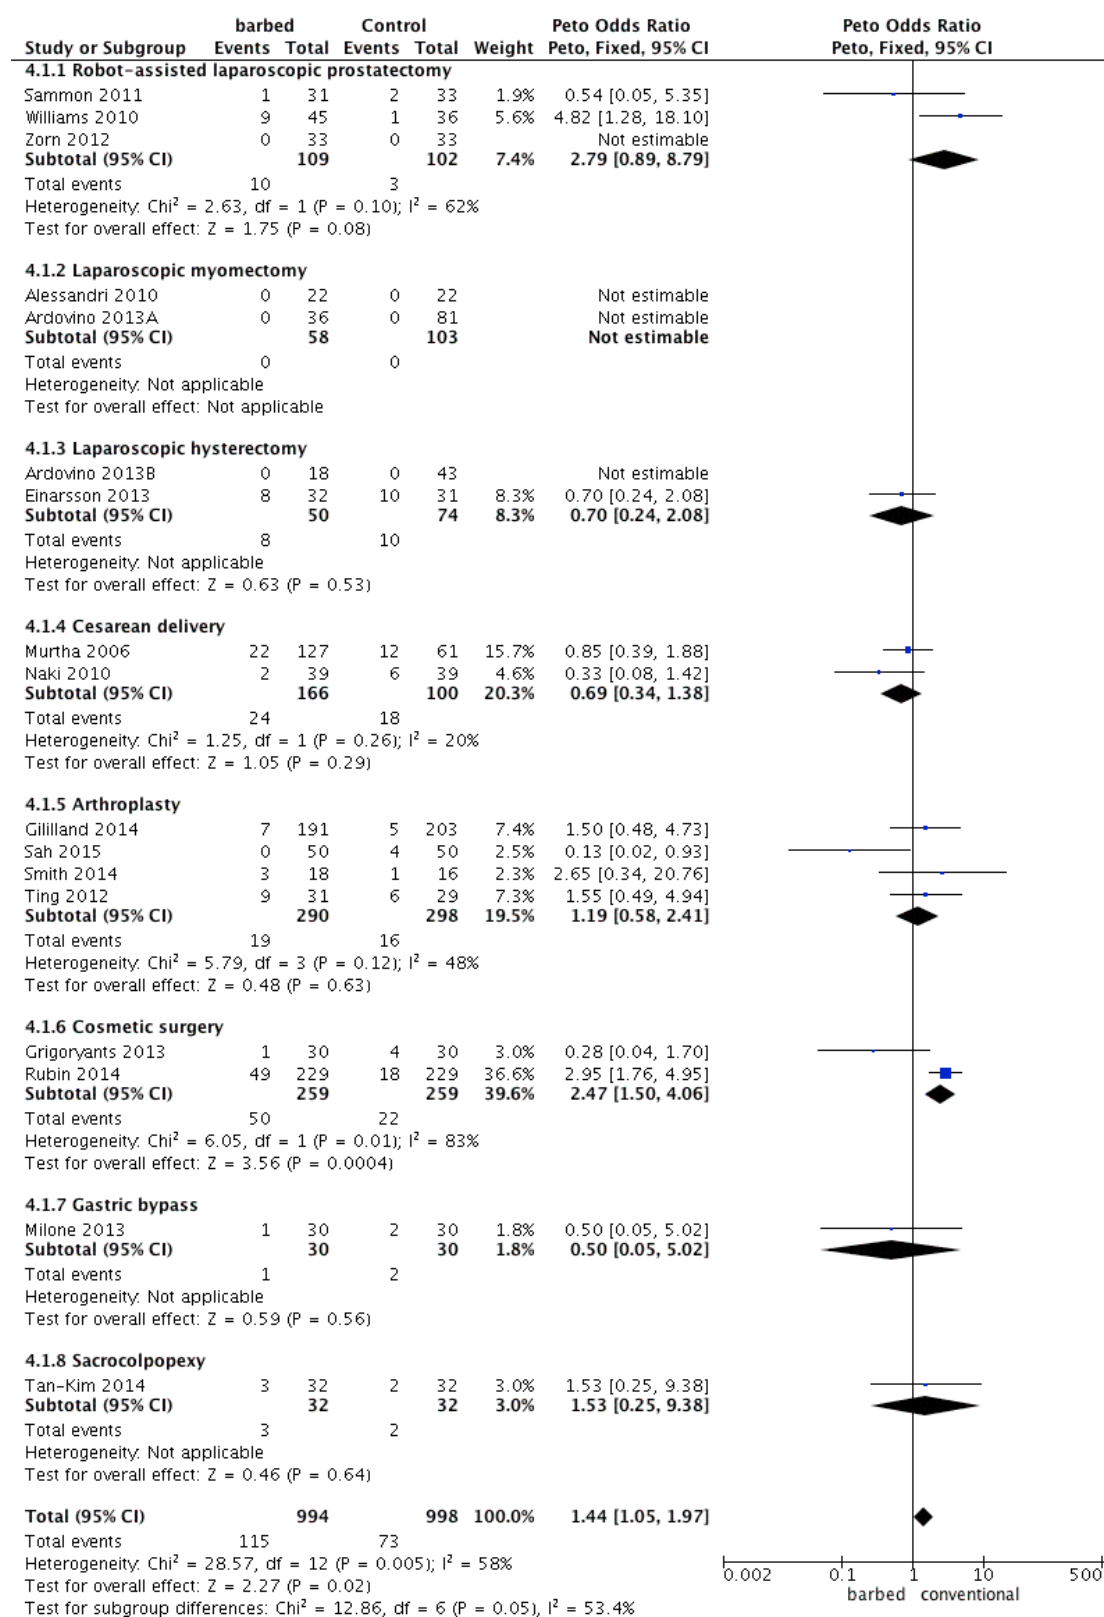

Appendix Figure 8: A forest plot of postoperative complications of different barbed types with or without barbed suture

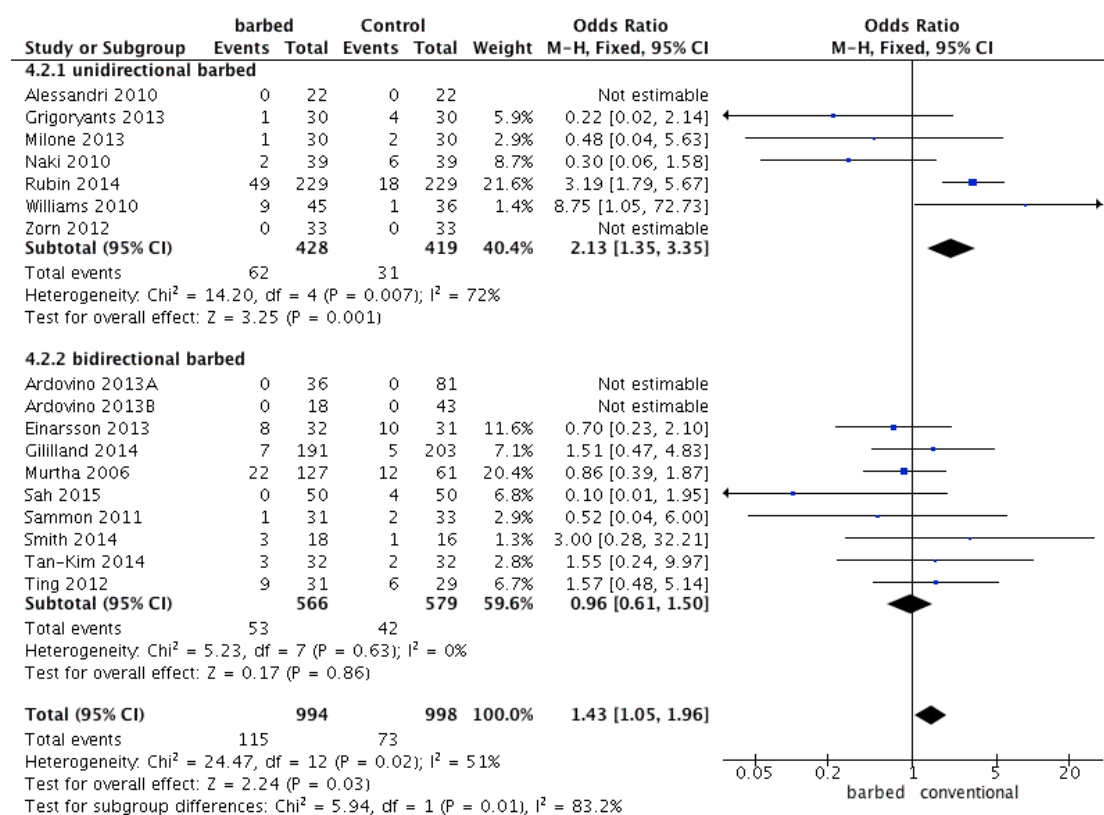

Appendix Figure 9: Sensitivity analyses of postoperative complications of different barbed types with or without barbed suture

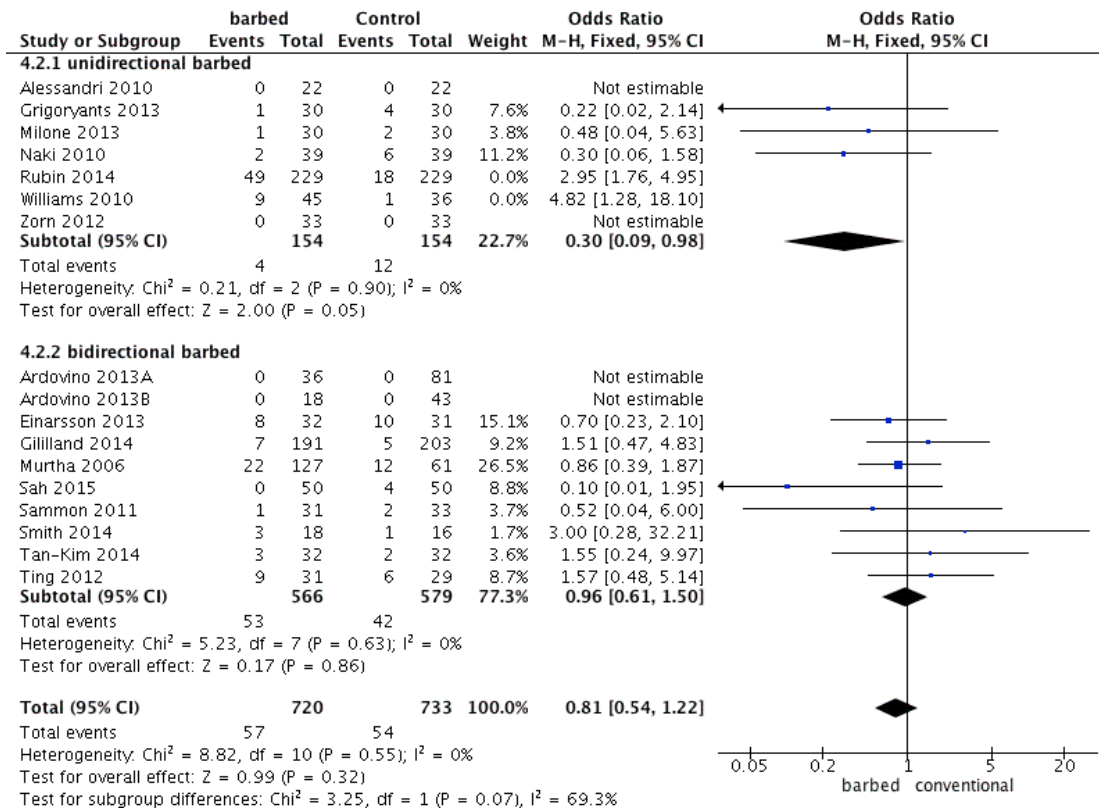

Appendix Figure 10: Funnel plot of suturing time in all included studies

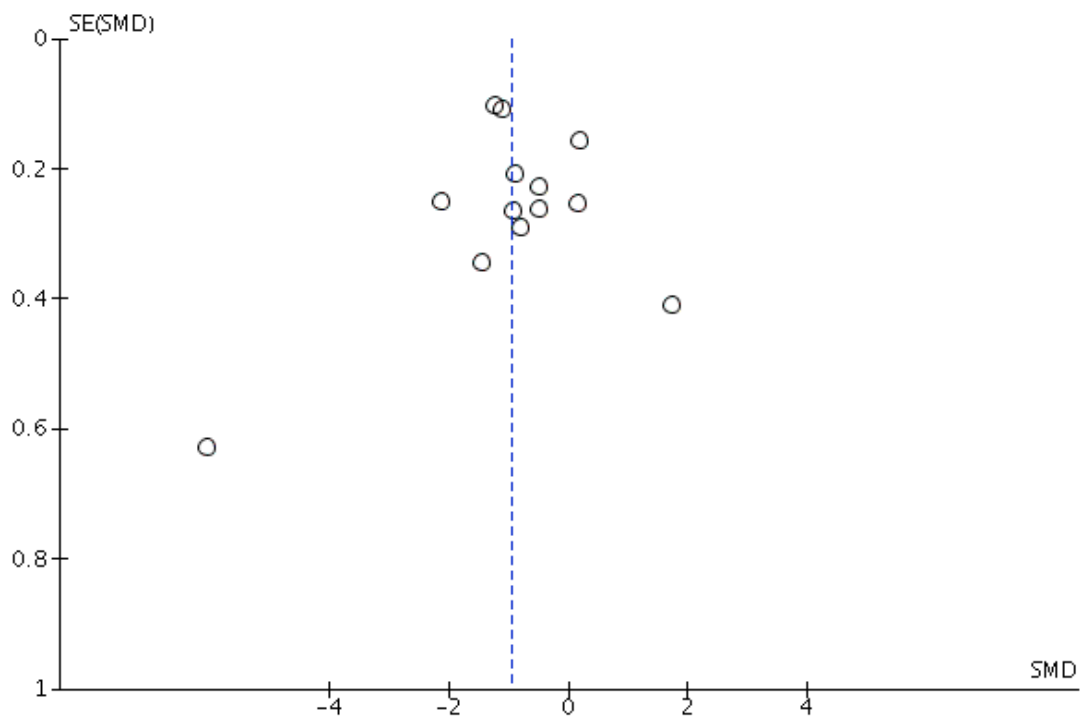

Appendix Figure 11: Funnel plot of operative time in all included studies



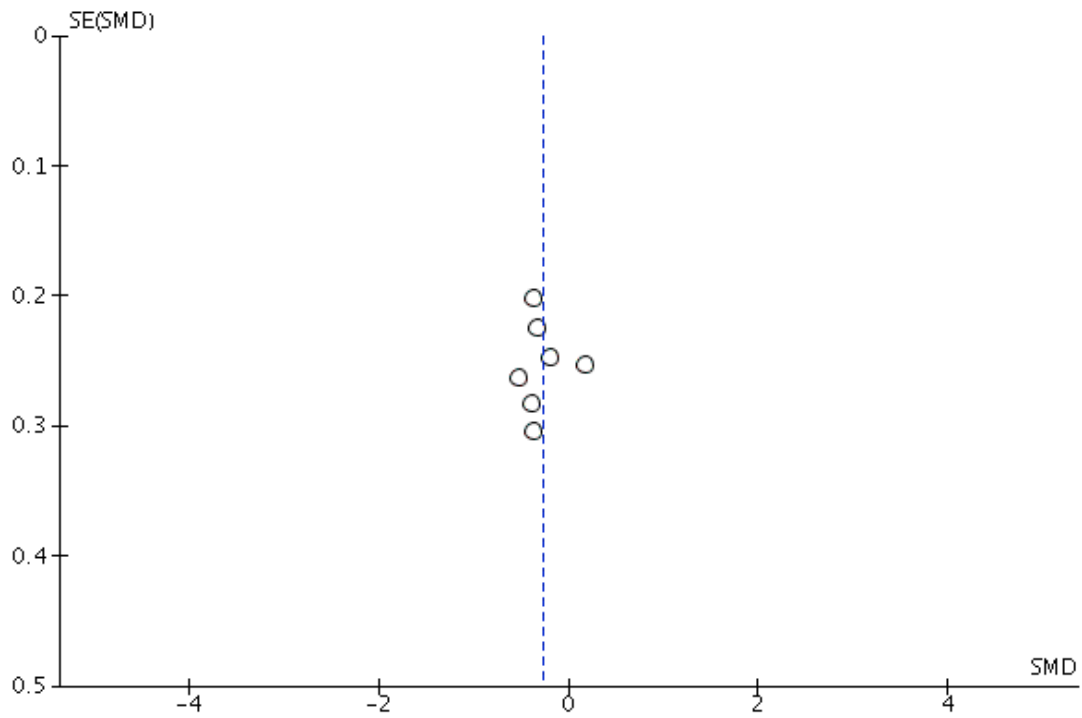

Appendix Figure 12: Funnel plot of estimate blood loss in all included studies

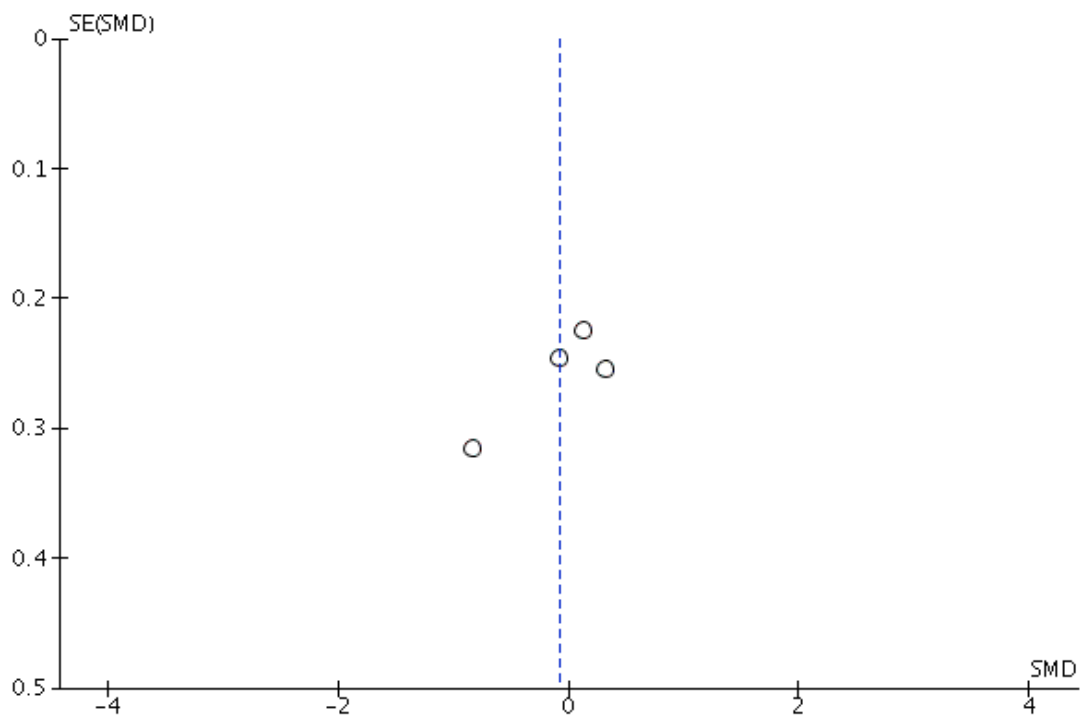

Appendix Figure 13: Funnel plot of postoperative complications in all included studies

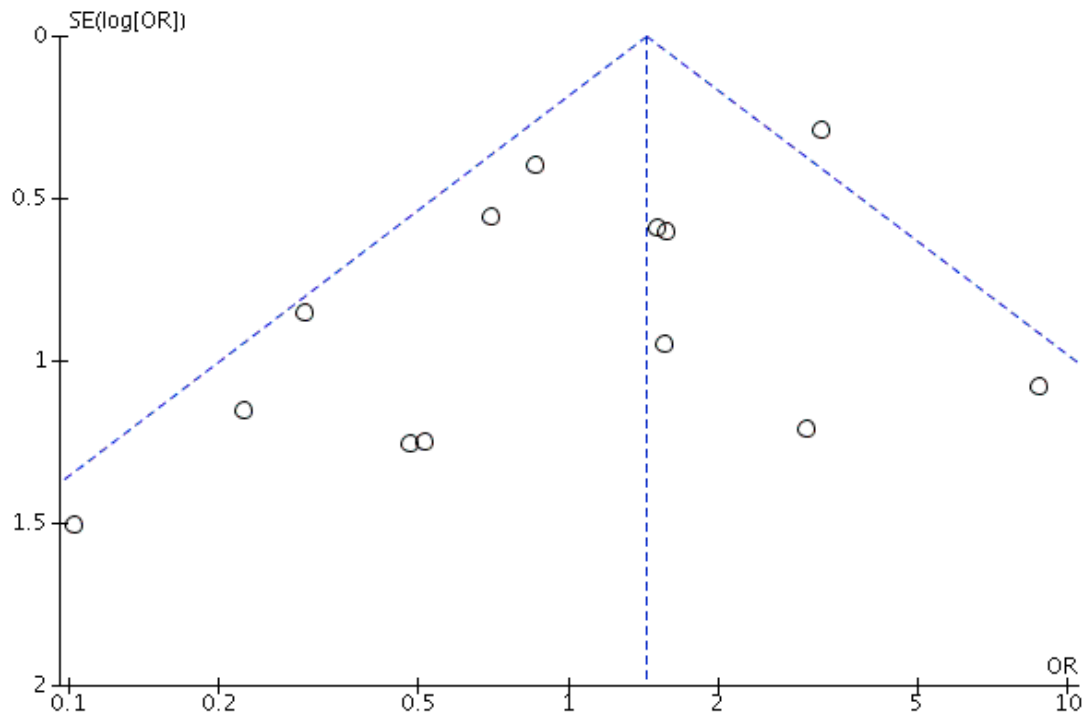

Appendix Table 1: Quality assessment of studies in the meta-analysis based on Cochrane recommendations

| Author year      | Random sequence generation                                                                                              | Allocation concealment         | Blinding of participants and personnel                                 | Blinding of outcome assessment          | Incomplete outcome data                                      | Selective reporting |
|------------------|-------------------------------------------------------------------------------------------------------------------------|--------------------------------|------------------------------------------------------------------------|-----------------------------------------|--------------------------------------------------------------|---------------------|
| Murtha 2006      | Subjects were randomized within strata in the ratio of two barbed suture subjects for every one control subject         | Using a closed envelope system | Subjects, but not the operating surgeon/investigators, were blinded    | Primary endpoint assessment was blinded | Lost follow-up in barbed/control group N(%): 4(3.1) / 2(3.2) | Not stated          |
| Alessandri 2010  | Computer generated                                                                                                      | Sealed opaque envelope         | Not stated                                                             | Not stated                              | No                                                           | Not stated          |
| Naki 2010        | Computer generated                                                                                                      | Sealed opaque envelopes        | Neither subjects nor the operating surgeon/ investigators were blinded | No                                      | No                                                           | No                  |
| Williams 2010    | Computer generated                                                                                                      | Not stated                     | Not stated                                                             | Not stated                              | Lost follow-up in barbed/control group N(%): 1(2.2)/0        | Not stated          |
| Sammon 2011      | Computer generated                                                                                                      | Not stated                     | Not stated                                                             | Not stated                              | No                                                           | Not stated          |
| Ting 2012        | Computer generated                                                                                                      | Sealed opaque envelopes        | Patients                                                               | No                                      | No                                                           | No                  |
| Zorn 2012        | After specimen entrapment, patients were randomized to either double-armed monofilament or barbed suture for PR and VUA | Not stated                     | Not stated                                                             | Not stated                              | No                                                           | Not stated          |
| Ardovin o 2013   | Computer generated                                                                                                      | Not stated                     | Not stated                                                             | Not stated                              | No                                                           | Not stated          |
| Ardovin o 2013   | Computer generated                                                                                                      | Not stated                     | Not stated                                                             | Not stated                              | No                                                           | Not stated          |
| Einarsson 2013   | Computer generated                                                                                                      | Opaque sealed envelopes        | Not stated                                                             | Not stated                              | No                                                           | No                  |
| Grigoryants 2013 | Coin toss                                                                                                               | Not stated                     | Not stated                                                             | A blinded evaluator                     | No                                                           | Not stated          |
| Milone 2013      | Computer generated                                                                                                      | Sealed envelopes               | Not stated                                                             | Not stated                              | No                                                           | Not stated          |

|               |                                                                          |                     |                                                            |                                                      |                                                              |            |
|---------------|--------------------------------------------------------------------------|---------------------|------------------------------------------------------------|------------------------------------------------------|--------------------------------------------------------------|------------|
| Gililand 2014 | The randomization occurred in the operating room                         | Not stated          | All patients were blinded                                  | Not stated                                           | No                                                           | Not stated |
| Rubin 2014    | Computer generated                                                       | Not stated          | Patients                                                   | Evaluated by an independent blinded plastic surgeon. | Lost follow-up in barbed/control group N(%): 21(18.2)/4(3.5) | No         |
| Smith 2014    | A random envelope was drawn which dictated the type of suture to be used | Sealed envelopes    | Blinding the patients to the type of suture they received. | Not stated                                           | No                                                           | Not stated |
| Tan-Kim 2014  | Computer generated                                                       | The sealed envelope | Not stated                                                 | Blinded examiner                                     | No                                                           | No         |
| Sah 2015      | Computer generated                                                       | Not stated          | Not stated                                                 | Blind evaluation.                                    | No                                                           | Not stated |
